# Supplementary material for: Dalbavancin binds ACE2 to block its interaction with SARS-CoV-2 spike protein and is effective in inhibiting SARS-CoV-2 infection in animal models
Source: PubMed Central journal article supplement (PMC7705431; doi:10.1038/s41422-020-00450-0), 2020-12-01
Supplement: 41422_2020_450_MOESM5_ESM.pdf [file 41422_2020_450_MOESM5_ESM.pdf]

## Supplementary Tables

**Table S1. Clinical peptide drugs with potential ability to inhibit ACE2-spike protein interactions**

| <b>Name</b>         | <b>CAS</b>  | <b>Reported target/function</b> | <b>Binding energy (kcal/mol)</b> |
|---------------------|-------------|---------------------------------|----------------------------------|
| Terlipressin        | 14636-12-5  | V1 receptors                    | -89.82                           |
| Desmopressin        | 16679-58-6  | V1/2/3 receptors                | -82.64                           |
| Octreotide acetate  | 79517-01-4  | Hormone somatostatin            | -82.61                           |
| DAPTA               | 106362-34-9 | CCR5                            | -75.49                           |
| Colistin sulfate    | 1264-72-8   | Anti-infection                  | -74.68                           |
| Dalbavancin         | 171500-79-1 | Anti-infection                  | -68.78                           |
| Pralmorelin         | 158861-67-7 | Growth hormone-releasing        | -66.96                           |
| Thymopentin         | 69558-55-0  | Immunology & HIV                | -55.08                           |
| Oxiglutatione       | 27025-41-8  | Detoxification                  | -55.07                           |
| Polymyxin B sulfate | 1405-20-5   | Anti-infection                  | -51.36                           |

**Table S2. Routine blood test results in rhesus macaques inoculated with SARS-CoV-2 with or without dalbavancin treatment.**

| Parameter |                                           | 0 dpi           | 1 dpi           | 3 dpi           | 5 dpi           | 7 dpi            |
|-----------|-------------------------------------------|-----------------|-----------------|-----------------|-----------------|------------------|
| Saline    | White blood cell count                    | 8.900 ± 2.905   | 8.500 ± 1.305   | 6.333 ± 0.8192  | 7.967 ± 0.4333  | 8.200 ± 0.1000   |
|           | Lymphocyte count                          | 1.900 ± 0.7638  | 2.967 ± 1.419   | 2.867 ± 0.7219  | 2.800 ± 0.7767  | 3.333 ± 0.4333   |
|           | Monocyte count                            | 0.6333 ± 0.1453 | 0.7333 ± 0.1202 | 0.5667 ± 0.1453 | 0.7667 ± 0.1764 | 0.6000 ± 0.05774 |
|           | Neutrophil count                          | 6.367 ± 3.299   | 4.800 ± 1.747   | 2.900 ± 0.4000  | 4.400 ± 0.7371  | 4.267 ± 0.5044   |
|           | Lymphocyte ratio                          | 28.30 ± 13.78   | 35.10 ± 14.96   | 44.37 ± 6.471   | 34.53 ± 8.028   | 40.47 ± 5.725    |
|           | Monocyte ratio                            | 7.733 ± 0.9025  | 8.567 ± 0.4702  | 8.800 ± 1.069   | 9.367 ± 1.761   | 7.600 ± 0.6807   |
|           | Neutrophil ratio                          | 63.97 ± 14.68   | 56.33 ± 15.43   | 46.83 ± 6.919   | 56.10 ± 9.782   | 51.93 ± 5.948    |
|           | Red blood cell count                      | 7.080 ± 0.04726 | 6.873 ± 0.3221  | 5.777 ± 0.2270  | 5.657 ± 0.3832  | 5.950 ± 0.1358   |
|           | Hemoglobin                                | 170.3 ± 2.667   | 163.0 ± 2.517   | 142.7 ± 1.764   | 137.0 ± 7.550   | 141.0 ± 3.606    |
|           | Hematocrit                                | 53.97 ± 1.757   | 51.93 ± 0.4333  | 42.67 ± 0.4096  | 41.60 ± 2.163   | 43.40 ± 1.124    |
|           | Mean corpuscular volume                   | 76.37 ± 2.990   | 75.90 ± 2.804   | 74.13 ± 2.339   | 73.93 ± 2.697   | 73.10 ± 2.200    |
|           | Mean corpuscular hemoglobin               | 24.03 ± 0.5175  | 23.77 ± 0.8413  | 24.70 ± 0.6658  | 24.20 ± 0.7211  | 23.67 ± 0.7333   |
|           | Mean corpuscular hemoglobin concentration | 315.3 ± 5.608   | 313.3 ± 4.055   | 334.0 ± 1.732   | 329.0 ± 2.517   | 324.3 ± 0.3333   |
|           | Red blood cell distribution width         | 13.53 ± 0.3283  | 13.97 ± 0.4910  | 12.10 ± 0.4041  | 12.07 ± 0.6173  | 12.17 ± 0.6119   |
|           | Platelet                                  | 550.7 ± 16.68   | 462.0 ± 31.58   | 353.0 ± 54.78   | 392.0 ± 75.74   | 446.7 ± 66.96    |
|           | Mean platelet volume                      | 8.533 ± 0.3756  | 8.233 ± 0.3383  | 8.233 ± 0.3528  | 8.167 ± 0.3180  | 8.200 ± 0.3512   |

|        |                    |          |          |          |          |          |
|--------|--------------------|----------|----------|----------|----------|----------|
|        | Platelet           | 16.40 ±  | 16.27 ±  | 16.57 ±  | 16.30 ±  | 16.47 ±  |
|        | distribution width | 0.2082   | 0.1202   | 0.1202   | 0.1528   | 0.2186   |
|        |                    | 0.4707 ± | 0.3820 ± | 0.2940 ± | 0.3237 ± | 0.3670 ± |
|        | Thrombocytocrit    | 0.03451  | 0.04204  | 0.05903  | 0.07435  | 0.06285  |
| Dalba  | White blood cell   | 9.300 ±  | 8.433 ±  | 7.167 ±  | 9.167 ±  | 8.233 ±  |
| vancin | count              | 0.4933   | 1.203    | 0.4842   | 2.338    | 1.033    |
|        | Lymphocyte         | 2.667 ±  | 3.067 ±  | 3.467 ±  | 3.333 ±  | 3.500 ±  |
|        | count              | 0.7881   | 0.7219   | 0.3180   | 0.5364   | 0.2517   |
|        |                    | 0.8000 ± | 0.9333 ± | 0.7333 ± | 0.7333 ± | 0.9000 ± |
|        | Monocyte count     | 0.1528   | 0.2848   | 0.03333  | 0.2333   | 0.2646   |
|        |                    | 5.833 ±  | 4.433 ±  | 2.967 ±  | 5.100 ±  | 3.833 ±  |
|        | Neutrophil count   | 0.9770   | 1.486    | 0.7424   | 1.960    | 0.5364   |
|        |                    | 28.90 ±  | 38.93 ±  | 49.57 ±  | 39.53 ±  | 43.03 ±  |
|        | Lymphocyte ratio   | 8.883    | 11.37    | 8.137    | 8.589    | 2.298    |
|        |                    | 8.500 ±  | 10.83 ±  | 10.20 ±  | 7.567 ±  | 10.83 ±  |
|        | Monocyte ratio     | 1.234    | 1.991    | 0.7638   | 0.7126   | 2.025    |
|        |                    | 62.60 ±  | 50.23 ±  | 40.23 ±  | 52.90 ±  | 46.13 ±  |
|        | Neutrophil ratio   | 9.655    | 9.672    | 8.500    | 7.881    | 0.7446   |
|        | Red blood cell     | 6.847 ±  | 7.180 ±  | 6.047 ±  | 5.953 ±  | 6.007 ±  |
|        | count              | 0.2375   | 0.1387   | 0.1625   | 0.1239   | 0.3055   |
|        |                    | 166.3 ±  | 170.3 ±  | 149.0 ±  | 142.7 ±  | 141.3 ±  |
|        | Hemoglobin         | 10.04    | 9.955    | 7.024    | 4.410    | 11.35    |
|        |                    | 50.77 ±  | 53.23 ±  | 44.10 ±  | 43.17 ±  | 43.93 ±  |
|        | Hematocrit         | 3.230    | 2.910    | 1.637    | 1.317    | 3.483    |
|        | Mean corpuscular   | 74.20 ±  | 74.20 ±  | 73.17 ±  | 72.73 ±  | 73.13 ±  |
|        | volume             | 3.620    | 3.747    | 3.430    | 3.524    | 3.710    |
|        | Mean corpuscular   | 24.23 ±  | 23.67 ±  | 24.63 ±  | 23.97 ±  | 23.47 ±  |
|        | hemoglobin         | 1.135    | 1.260    | 1.302    | 1.132    | 1.132    |
|        | Mean corpuscular   | 327.3 ±  | 319.3 ±  | 337.0 ±  | 330.3 ±  | 321.3 ±  |
|        | hemoglobin         | 1.202    | 1.333    | 3.786    | 3.667    | 1.764    |
|        | concentration      |          |          |          |          |          |
|        | Red blood cell     | 13.73 ±  | 13.80 ±  | 13.93 ±  | 13.43 ±  | 13.97 ±  |
|        | distribution width | 0.8667   | 0.8185   | 0.8007   | 0.7753   | 0.8950   |
|        |                    | 650.0 ±  | 534.0 ±  | 480.7 ±  | 452.0 ±  | 545.3 ±  |
|        | Platelet           | 42.00    | 49.90    | 10.59    | 24.58    | 41.91    |
|        | Mean platelet      | 7.567 ±  | 7.467 ±  | 7.333 ±  | 7.267 ±  | 7.633 ±  |
|        | volume             | 0.2906   | 0.2848   | 0.08819  | 0.2028   | 0.5207   |
|        | Platelet           | 16.30 ±  | 16.37 ±  | 16.27 ±  | 16.23 ±  | 16.27 ±  |

|                    |          |          |          |          |          |
|--------------------|----------|----------|----------|----------|----------|
| distribution width | 0.1528   | 0.06667  | 0.1333   | 0.1333   | 0.1333   |
|                    | 0.4887 ± | 0.3957 ± | 0.3520 ± | 0.3273 ± | 0.4187 ± |
| Thrombocytocrit    | 0.01338  | 0.02281  | 0.004726 | 0.008969 | 0.05795  |

---

Data are mean ± SD.

**Table S3. Blood biochemistry results in rhesus macaques inoculated with SARS-CoV-2 with or without dalbavancin treatment.**

| <b>Parameter</b>           | <b>0 dpi</b> | <b>1 dpi</b> | <b>3 dpi</b> | <b>5 dpi</b> | <b>7 dpi</b> |
|----------------------------|--------------|--------------|--------------|--------------|--------------|
| Saline Blood sugar         | 144.7 ±      | 89.00 ±      | 50.33 ±      | 52.67 ±      | 56.33 ±      |
| mg/dL                      | 40.88        | 13.43        | 5.239        | 6.766        | 13.54        |
| Creatinine                 | 0.7667 ±     | 0.7000 ±     | 0.5000 ±     | 0.5333 ±     | 0.5333 ±     |
| (CREA) mg/dL               | 0.1764       | 0.1528       | 0.05774      | 0.03333      | 0.03333      |
| Blood urea nitrogen (BUN)  | 40.00 ±      | 34.33 ±      | 25.00 ±      | 19.67 ±      | 18.00 ±      |
| mg/dL                      | 8.185        | 4.842        | 1.155        | 0.6667       | 1.155        |
| BUN/CREA                   | 52.67 ±      | 51.33 ±      | 49.00 ±      | 37.00 ±      | 34.00 ±      |
|                            | 6.064        | 4.096        | 3.606        | 3.055        | 4.000        |
| Total protein g/dL         | 8.300 ±      | 8.033 ±      | 7.300 ±      | 7.233 ±      | 6.967 ±      |
|                            | 0.1000       | 0.1333       | 0.1528       | 0.06667      | 0.2603       |
| Albumin (ALB)              | 4.033 ±      | 3.733 ±      | 3.267 ±      | 3.300 ±      | 3.167 ±      |
| g/dL                       | 0.06667      | 0.1202       | 0.1202       | 0.05774      | 0.08819      |
| Globulin (GLOB)            | 4.233 ±      | 4.367 ±      | 4.033 ±      | 3.967 ±      | 3.833 ±      |
| g/dL                       | 0.03333      | 0.1856       | 0.1453       | 0.08819      | 0.2028       |
| ALB/GLOB                   | 0.9333 ±     | 0.8667 ±     | 0.8000 ±     | 0.8333 ±     | 0.8667 ±     |
|                            | 0.03333      | 0.06667      | 0.05774      | 0.03333      | 0.03333      |
| Alanine aminotransferase   | 29.67 ±      | 31.67 ±      | 53.67 ±      | 99.67 ±      | 59.00 ±      |
| U/L                        | 12.20        | 7.126        | 18.49        | 42.48        | 24.11        |
| Aspartate aminotransferase | 22.33 ±      | 45.33 ±      | 51.00 ±      | 52.33 ±      | 45.00 ±      |
| U/L                        | 11.61        | 7.219        | 7.550        | 11.41        | 10.58        |
| Cholesterol                | 155.7 ±      | 109.0 ±      | 70.67 ±      | 84.00 ±      | 83.67 ±      |
| mg/dL                      | 15.86        | 18.88        | 2.728        | 3.786        | 1.667        |
| Triglyceride               | 57.33 ±      | 54.00 ±      | 31.33 ±      | 48.67 ±      | 52.00 ±      |
| mg/dL                      | 9.838        | 6.506        | 19.13        | 0.8819       | 5.132        |
| Creatine kinase            | 83.67 ±      | 349.7 ±      | 69.67 ±      | 92.67 ±      | 96.00 ±      |
| U/L                        | 22.30        | 122.5        | 6.489        | 13.48        | 28.01        |
| Lactate dehydrogenase      | 792.7 ±      | 864.7 ±      | 1634 ± 532.9 | 1279 ±       | 1286 ±       |
| U/L                        | 316.5        | 154.7        |              | 541.7        | 301.0        |
| Lactate mmol/L             | 8.060 ±      | 8.907 ±      | 5.497 ±      | 4.683 ±      | 6.517 ±      |

|        |                    | 0.9829       | 1.583    | 1.066        | 0.8274   | 1.353    |
|--------|--------------------|--------------|----------|--------------|----------|----------|
| Dalba  | Blood sugar        | 117.7 ±      | 72.33 ±  | 52.67 ±      | 53.00 ±  | 42.67 ±  |
| vancin | mg/dL              | 23.31        | 8.007    | 4.842        | 4.583    | 4.667    |
|        | Creatinine         | 0.6000 ±     | 0.6333 ± | 0.5333 ±     | 0.5667 ± | 0.7000 ± |
|        | (CREA) mg/dL       | 0.05774      | 0.1453   | 0.06667      | 0.03333  | 0.1528   |
|        | Blood urea         |              |          |              |          |          |
|        | nitrogen (BUN)     | 50.67 ±      | 39.00 ±  | 27.67 ±      | 25.67 ±  | 24.33 ±  |
|        | mg/dL              | 15.38        | 8.083    | 4.667        | 4.702    | 4.910    |
|        |                    | 94.67 ±      | 70.33 ±  | 55.33 ±      | 46.33 ±  | 41.33 ±  |
|        | BUN/CREA           | 38.52        | 26.27    | 9.735        | 5.548    | 12.99    |
|        |                    | 8.067 ±      | 8.667 ±  | 7.700 ±      | 7.633 ±  | 7.833 ±  |
|        | Total protein g/dL | 0.1667       | 0.1764   | 0.2082       | 0.3844   | 0.3756   |
|        | Albumin (ALB)      | 3.633 ±      | 4.033 ±  | 3.467 ±      | 3.400 ±  | 3.933 ±  |
|        | g/dL               | 0.2028       | 0.3528   | 0.2333       | 0.1528   | 0.6888   |
|        | Globulin (GLOB)    | 4.400 ±      | 4.600 ±  | 4.233 ±      | 4.200 ±  | 3.900 ±  |
|        | g/dL               | 0.3786       | 0.4933   | 0.4333       | 0.4359   | 0.3786   |
|        |                    | 0.8000 ±     | 0.9000 ± | 0.8333 ±     | 0.8000 ± | 1.067 ±  |
|        | ALB/GLOB           | 0.1155       | 0.1732   | 0.1453       | 0.1000   | 0.2728   |
|        | Alanine            |              |          |              |          |          |
|        | aminotransferase   | 31.00 ±      | 39.67 ±  | 25.67 ±      | 44.67 ±  | 50.67 ±  |
|        | U/L                | 6.658        | 16.33    | 9.563        | 13.87    | 26.34    |
|        | Aspartate          |              |          |              |          |          |
|        | aminotransferase   | 16.00 ±      | 91.33 ±  | 40.33 ±      | 50.67 ±  | 55.50 ±  |
|        | U/L                | 8.000        | 58.34    | 8.413        | 11.68    | 21.50    |
|        | Cholesterol        | 171.0 ±      | 153.0 ±  | 89.33 ±      | 88.67 ±  | 107.0 ±  |
|        | mg/dL              | 16.20        | 15.95    | 9.333        | 8.212    | 16.07    |
|        | Triglyceride       | 38.67 ±      | 82.00 ±  | 60.33 ±      | 48.67 ±  | 75.33 ±  |
|        | mg/dL              | 8.293        | 42.00    | 14.81        | 0.8819   | 38.40    |
|        | Creatine kinase    | 189.3 ±      | 573.0 ±  | 141.0 ±      | 275.7 ±  | 552.7 ±  |
|        | U/L                | 63.94        | 370.5    | 47.04        | 47.68    | 337.8    |
|        | Lactate            |              |          |              |          |          |
|        | dehydrogenase      | 1544 ± 271.6 | 1771 ±   | 2249 ± 372.7 | 1650 ±   | 1932 ±   |
|        | U/L                |              | 122.0    |              | 195.2    | 63.50    |
|        |                    | 6.787 ±      | 7.463 ±  | 6.500 ±      | 3.193 ±  | 6.110 ±  |
|        | Lactate mmol/L     | 2.322        | 2.455    | 2.757        | 0.5154   | 2.954    |

Data are mean ± SD.
